## CORRESPONDENCE

diac enzyme determinations, suggests that the myocardium may have been protected during coronary artery clamping and cardiac standstill.

Finally, Dr. Lennon misinterpreted our rationale for using adenosine in this patient. We did not give adenosine for the purpose of preconditioning. After we were unable to effectively decrease the patient's heart rate with esmolol, we gave adenosine for the sole purpose of providing intermittent, brief periods of cardiac standstill so that the surgeons could complete the anastomosis. As we stated in our discussion, there are no reports that suggest that intermittent cardiac standstill produced by the administration of adenosine mimic ischemic preconditioning.

**Girish P. Joshi, M.B., B.S., M.D., F.F.A.R.C.S.I.**  
**Paige Latham, M.D.**

Department of Anesthesiology and Pain Management  
 University of Texas Southwestern Medical Center

5323 Harry Hines Boulevard  
 Dallas, Texas  
 girish.joshi@email.swmed.edu

## References

1. Borges MF, Spohn PK, Coulson AS: Arrhythmias/ischemia management during minimally invasive cardiac operation. *Ann Thorac Surg* 1997; 64:843-4
2. Jacobsohn E, Young CJ, Aronson S, Ferdinand FD, Albertucci M: The role of ischemic preconditioning during minimally invasive coronary artery bypass surgery. *J Cardiothorac Vasc Anesth* 1997; 11: 787-92

(Accepted for publication July 30, 1998.)

Anesthesiology

1998; 89:1602

© 1998 American Society of Anesthesiologists, Inc.

Lippincott Williams & Wilkins

## Value of Presenting the Time-course of Pain Relief in Analgesic Trials

*To the Editor:*—We read with great interest the study by Gautier *et al.*<sup>1</sup> in the March issue of ANESTHESIOLOGY. Clinical trials to evaluate the interactions of analgesics at the spinal cord level are very important. Gautier *et al.* present only the maximum pain relief score, the time at which this occurred, and the duration of adequate analgesia (*i.e.*, time to first analgesic request after intrathecal injection). However, two agents that share these three parameters may not be equally effective (as illustrated in figure 1 using hypothetical data). A similar comprehensive description of side effects may be useful in analyzing their incidence and severity. Furthermore, such analysis may provide useful information on possible synergistic or additive interactions between sufentanil and clonidine in this particular clinical setting.

**Leonidas C. Goudas, M.D., Ph.D.**  
 Assistant Professor, Research  
**Daniel B. Carr, M.D., F.A.B.P.M.**  
 Saltonstall Professor of Pain Research  
 Department of Anesthesia  
 New England Medical Center  
 Boston, Massachusetts  
 dcarr@opal.tufts.edu

## Reference

1. Gautier PE, De Kock M, Fanard L, Van Steenberg A, Hody J-L: Intrathecal clonidine combined with sufentanil for labor analgesia. *ANESTHESIOLOGY* 1998; 88:651-6

(Accepted for publication August 6, 1998.)

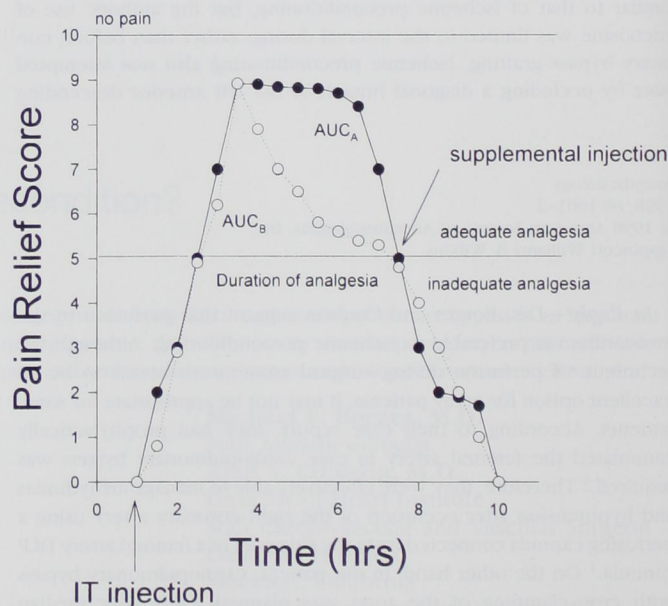

**Fig. 1.** Pain relief scores for two drugs, "A" (●) and "B" (○). Both drugs have identical onset, peak effect, and duration of action until supplemental analgesia is needed. Note, however, different areas under the curve (AUC) of pain relief above threshold versus time.
